# Supplementary material for: Single- and two-photon excited photoluminescence of 2D perovskite thin films with different organic spacer cations
Source: Royal Society of Chemistry journal article supplement (doi:10.1039/d4tc03184a), 2024-01-01
Supplement: d4tc03184a1.pdf [file d4tc03184a1.pdf]

Electronic Supplementary Material (ESI) for Journal of Materials Chemistry C.  
This journal is © The Royal Society of Chemistry 2024

## Supporting Information

### **Single- and two-photon excited photoluminescence of 2D perovskite thin films with different organic spacer cations**

Tai Luo,<sup>a</sup> Junzi Li,<sup>a</sup> Yanyan Cui,<sup>a</sup> Hao Jin,<sup>\*b</sup> and Tingchao He<sup>\*a</sup>

<sup>a</sup>Key Laboratory of Optoelectronic Devices and Systems of Ministry of Education and Guangdong Province, College of Physics and Optoelectronic Engineering, Shenzhen University, Shenzhen 518060, China. Email: [tche@szu.edu.cn](mailto:tche@szu.edu.cn)

<sup>b</sup>College of Physics and Optoelectronic Engineering, Shenzhen University, Shenzhen 518060, China. Email: [hjin@szu.edu.cn](mailto:hjin@szu.edu.cn)

The crystallographic structures of  $(EA)_2PbBr_4$ ,  $(PA)_2PbBr_4$ , and  $(BA)_2PbBr_4$  were obtained from the Cambridge Crystallographic Data Centre via [www.ccdc.cam.ac.uk/data\\_request/cif](http://www.ccdc.cam.ac.uk/data_request/cif). CCDC numbers 1855044, 2171431 and 1521054 correspond to  $(EA)_2PbBr_4$ ,  $(PA)_2PbBr_4$ , and  $(BA)_2PbBr_4$  films, respectively.

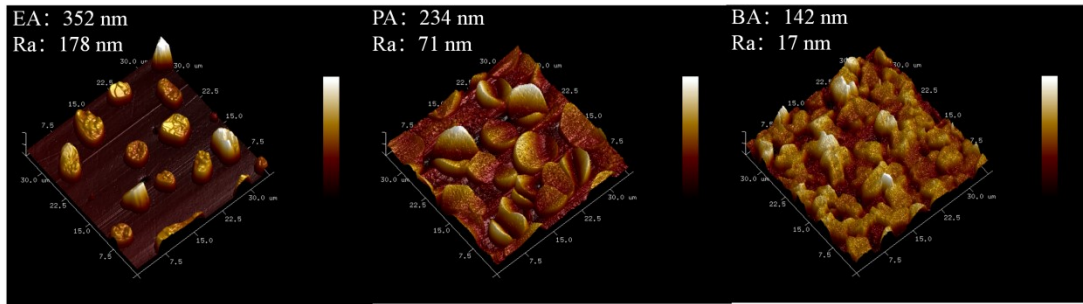

**Fig. S1** AFM images of  $(EA)_2PbBr_4$ ,  $(PA)_2PbBr_4$ , and  $(BA)_2PbBr_4$  films.

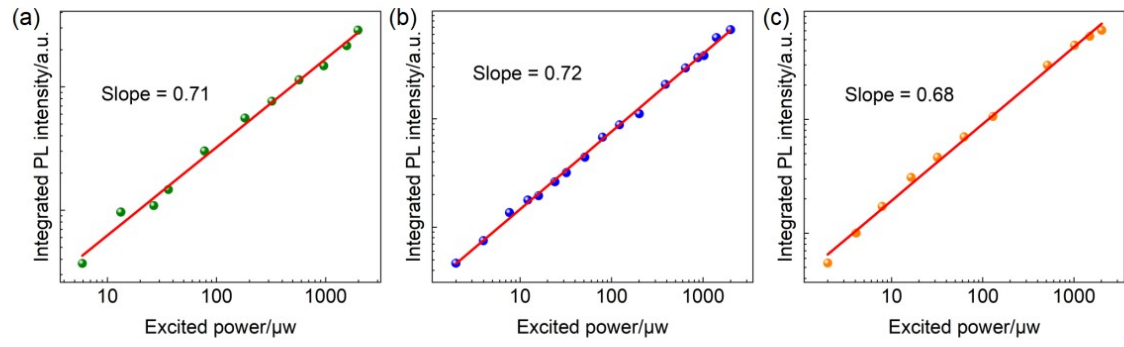

**Fig. S2** Integrated PL intensity as a function of excitation power for three samples. (a)  $(\text{EA})_2\text{PbBr}_4$ , (b)  $(\text{PA})_2\text{PbBr}_4$ , and (c)  $(\text{BA})_2\text{PbBr}_4$  films.

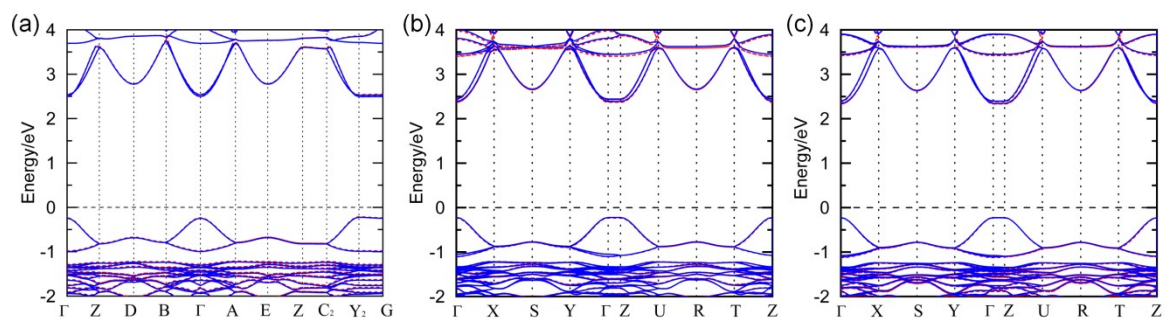

**Fig. S3** The calculated band structures for (a)  $(EA)_2PbBr_4$ , (b)  $(PA)_2PbBr_4$  and (c)  $(BA)_2PbBr_4$ . The red and blue colors represent the results with and without VDW correction.

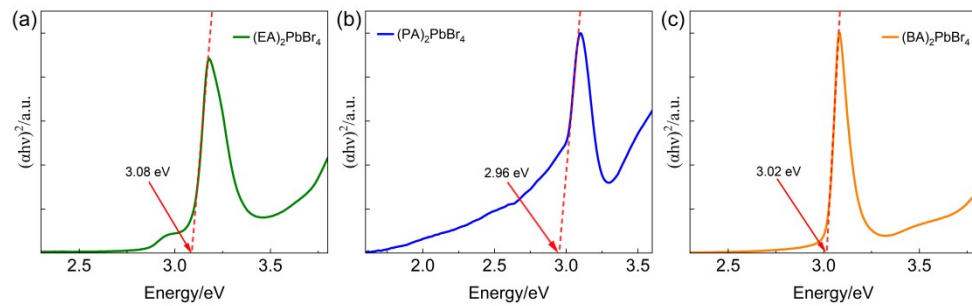

**Fig. S4** Tauc plots of (a)  $(\text{EA})_2\text{PbBr}_4$ , (b)  $(\text{PA})_2\text{PbBr}_4$ , and (c)  $(\text{BA})_2\text{PbBr}_4$  films. The dashed lines represent the corresponding absorption band edges.

**Table S1.** Band gaps with and without SOC using different functionals.

|                                     | with SOC (eV) |      | without SOC (eV) |      | Exp. (eV) |
|-------------------------------------|---------------|------|------------------|------|-----------|
|                                     | PBE           | HSE  | PBE              | HSE  | Tauc      |
| (EA) <sub>2</sub> PbBr <sub>4</sub> | 2.01          | 2.75 | 2.72             | 3.50 | 3.08      |
| (PA) <sub>2</sub> PbBr <sub>4</sub> | 1.87          | 2.58 | 2.60             | 3.35 | 2.96      |
| (BA) <sub>2</sub> PbBr <sub>4</sub> | 1.84          | 2.53 | 2.56             | 3.31 | 3.02      |

**Table S2.** Calculated lattice constants (with vs. without VDW correction).

The unit is Å.

|                                     | <i>a</i>        | <i>b</i>      | <i>c</i>        |
|-------------------------------------|-----------------|---------------|-----------------|
| (EA) <sub>2</sub> PbBr <sub>4</sub> | 11.75 vs. 11.75 | 8.24 vs. 8.24 | 7.73 vs. 7.73   |
| (PA) <sub>2</sub> PbBr <sub>4</sub> | 8.27 vs. 8.29   | 8.19 vs. 8.21 | 25.09 vs. 25.15 |
| (BA) <sub>2</sub> PbBr <sub>4</sub> | 8.31 vs. 8.32   | 8.17 vs. 8.18 | 27.62 vs. 27.66 |
